# Supplementary material
Source: PubMed Central journal article supplement (PMC2329934)
Supplement: plntcell_tpc.107.055137_1.pdf [file plntcell_tpc.107.055137_1.pdf]

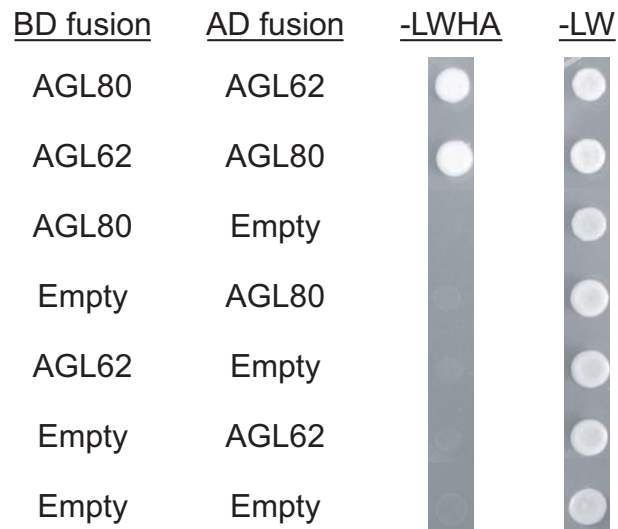

**Supplemental Figure 1.** Yeast Two-Hybrid Analysis of AGL62-AGL80 Interaction.

Growth occurs only when cells contain both AGL80-BD and AGL62-AD (row 1) or both AGL62-BD and AGL80-AD (row 2). Cells containing AGL80-BD only (row 3), AGL80-AD only (row 4), AGL62-BD only (row 5), AGL62-AD only (row 6), and neither AGL62 nor AGL80 (row 7) do not grow.

Abbreviations: AD, GAL4 activation domain; BD, GAL4 DNA-binding domain; -LW, growth medium lacking leucine and tryptophan; -LWHA, growth medium lacking leucine, tryptophan, histidine and adenine.

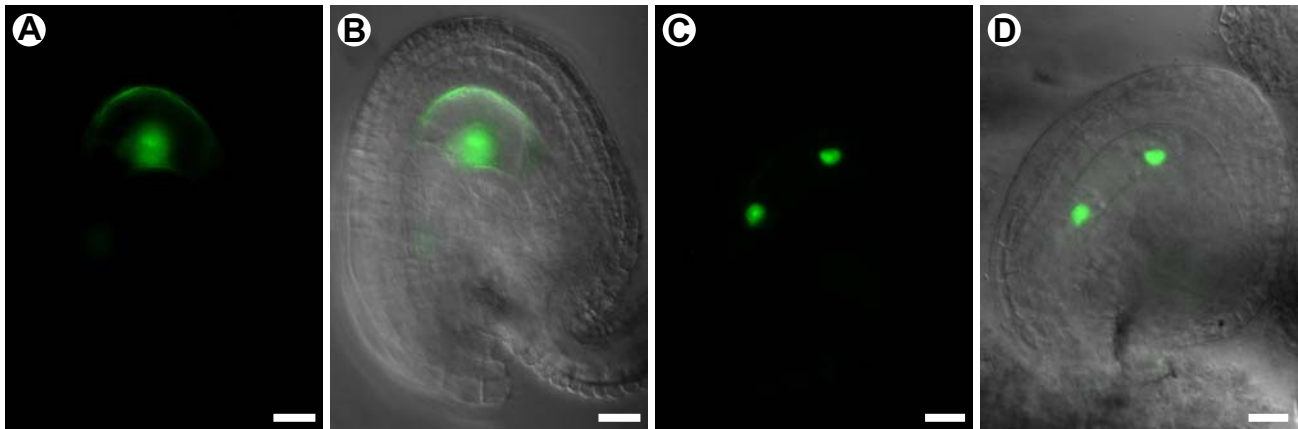

**Supplemental Figure 2.** Expression of the Paternally Derived Allele of *AGL62-GFP* During Early Endosperm Development.

(A) and (C) Fluorescence images of the GFP signals.

(B) and (D) Fluorescence-brightfield overlay images.

(A) and (B) Expression of paternally derived *AGL62-GFP* in stage I endosperm.

(C) and (D) Expression of paternally derived *AGL62-GFP* in stage II endosperm.

Scale Bars = 20  $\mu$ m.

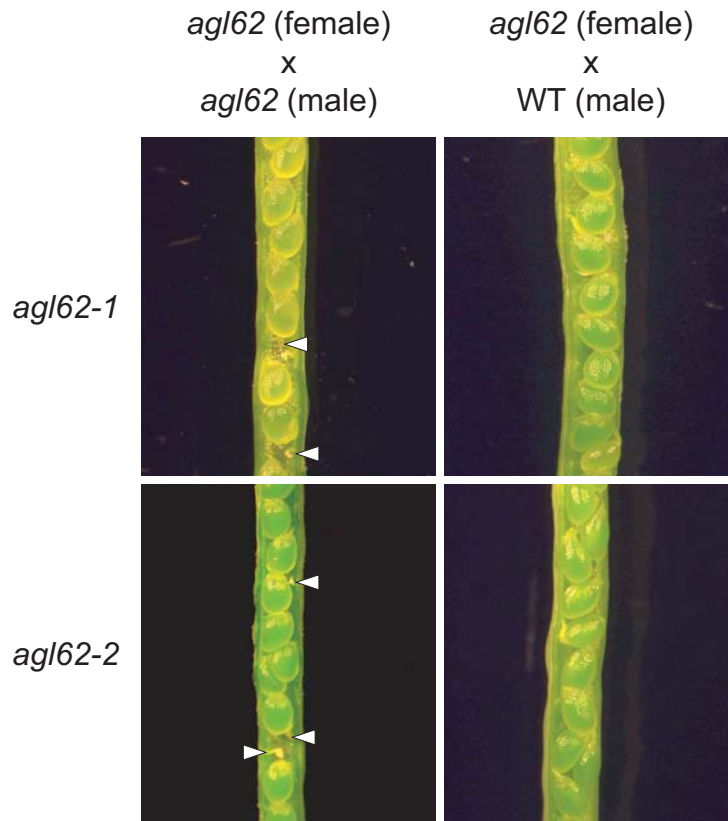

**Supplemental Figure 3.** Silique Phenotypes of *agl62-1* and *agl62-2* Mutants at 10 Days After Pollination.

Siliques of self-crossed heterozygous plants (left panels) have defective seeds. Arrowheads point to defective seeds. Siliques resulting from crosses of heterozygous females with wild-type (WT) males (right panels) do not exhibit defective seeds.

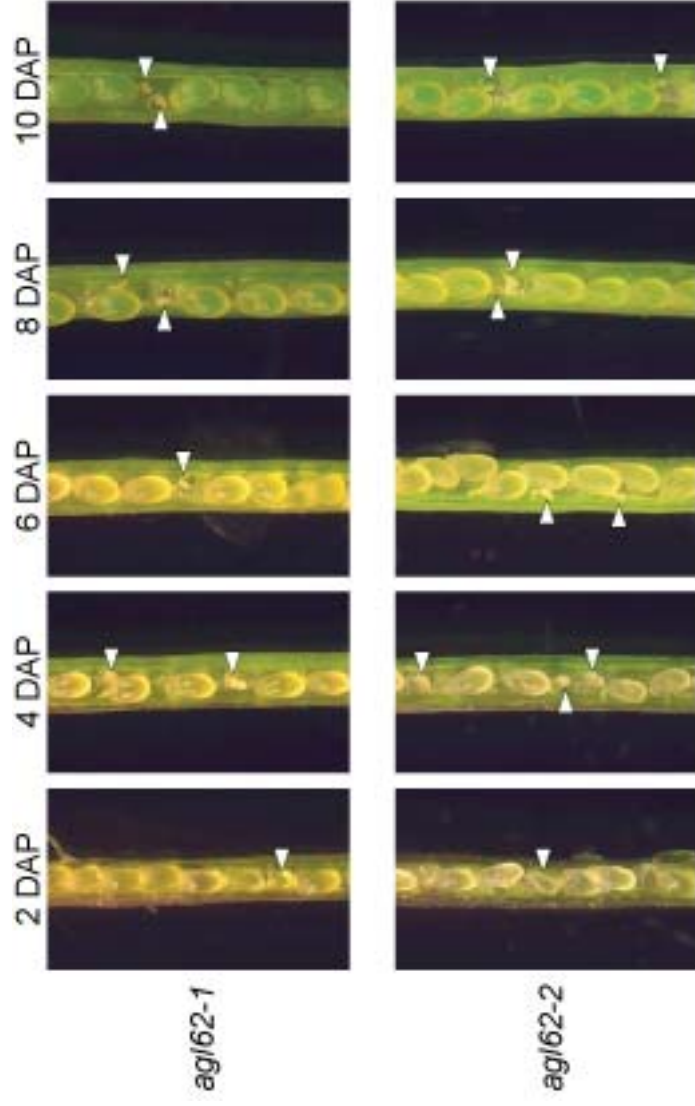

**Supplemental Figure 4.** Silique Phenotypes of Self-Pollinated *agl62-1/AGL62* and *agl62-2/AGL62* Plants at 2-10 Days After Pollination (DAP).

With both alleles, defective seeds (arrowheads) are observed as early as two days after pollination (2 DAP).

## **SUPPLEMENTAL TABLES**

**Supplemental Table 1.** Expression of the Maternal and Paternal Alleles of *AGL62-GFP* During Endosperm Development.

| Endosperm Developmental Stage | No. of Endosperm Nuclei | Embryo Developmental Stage | Expression of Paternal Allele | Expression of Maternal Allele |
|-------------------------------|-------------------------|----------------------------|-------------------------------|-------------------------------|
| I                             | 1                       | Zygote                     | ++                            | ++                            |
| II                            | 2                       | Zygote                     | +++                           | +++                           |
| III                           | 4                       | Zygote                     | +++                           | +++                           |
| IV                            | 8                       | Elong. Zygote              | +++                           | +++                           |
| V                             | 14-16                   | Elong. Zygote, 1-celled    | +++                           | +++                           |
| VI                            | 26-30                   | 1-2 celled                 | +++                           | +++                           |
| VII                           | ~50                     | 2-4 celled                 | +++                           | +++                           |
| VIII                          | ~100                    | Octant                     | +                             | +                             |
| IX                            | ~200                    | Dermatogen-globular        | -                             | -                             |
| X                             | ~300                    | Heart                      | -                             | -                             |

Endosperm developmental stages defined in Boissard-Lorig, et al. (2001) and Ingouff et al. (2005). Cellularization in the PEN is initiated during stage IX (Sorensen et al., 2002).

## **SUPPLEMENTAL METHODS**

### **Yeast Two-Hybrid Analysis**

We used the Clontech Matchmaker GAL4 Two-Hybrid System 3 for the yeast two-hybrid analysis. The AGL80 and AGL62 open reading frames (without introns) were fused to the GAL4 activation domain and GAL4 DNA-binding domain in pGAD-T7 and pGBK-T7. Yeast strain AH109 was cotransformed with combinations of pGAD-T7 and pGBK-T7 constructs (AGL80 plus AGL62 or controls containing one or both empty vectors) and selected on synthetic dropout (SD) medium lacking leucine and tryptophan (SD-LW). Co-transformants were then assayed for interaction and activation of the histidine and adenine reporter genes on SD medium lacking leucine, tryptophan, histidine and adenine (SD-LWHA). For this, fresh colonies were grown in SD-LW at 30°C overnight to an OD of 1-2, the cells were pelleted and resuspended in 0.5 M sorbitol to an OD of 0.5, and 3 µl of each cell suspension was spotted on SD-LWHA plates using a multi-channel pipetor and grown at 30°C for 2-3 days.
